# Supplementary material for: m6A methyltransferase METTL16 mediates immune evasion of colorectal cancer cells via epigenetically regulating PD-L1 expression
Source: PubMed Central journal article supplement (PMC10496997; doi:10.18632/aging.204980), 2023-08-29
Supplement: aging-15-204980-s001.pdf [file aging-15-204980-s001.pdf]

## SUPPLEMENTARY FIGURE

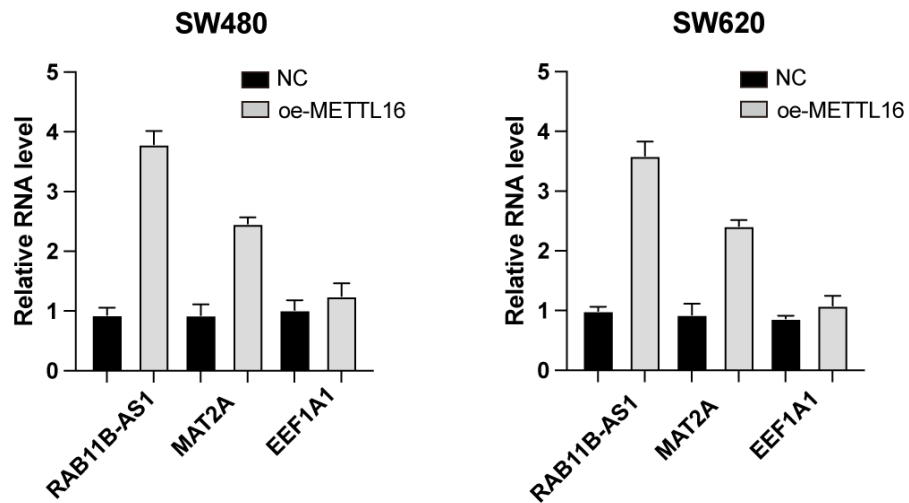

Supplementary Figure 1. The RNA level of RAB11B-AS1, MAT2A, and EEF1A1 in CRC cells under alteration of METTL16.
